# Supplementary material
Source: PubMed Central journal article supplement (PMC3041589)

# Supplementary Figure 1

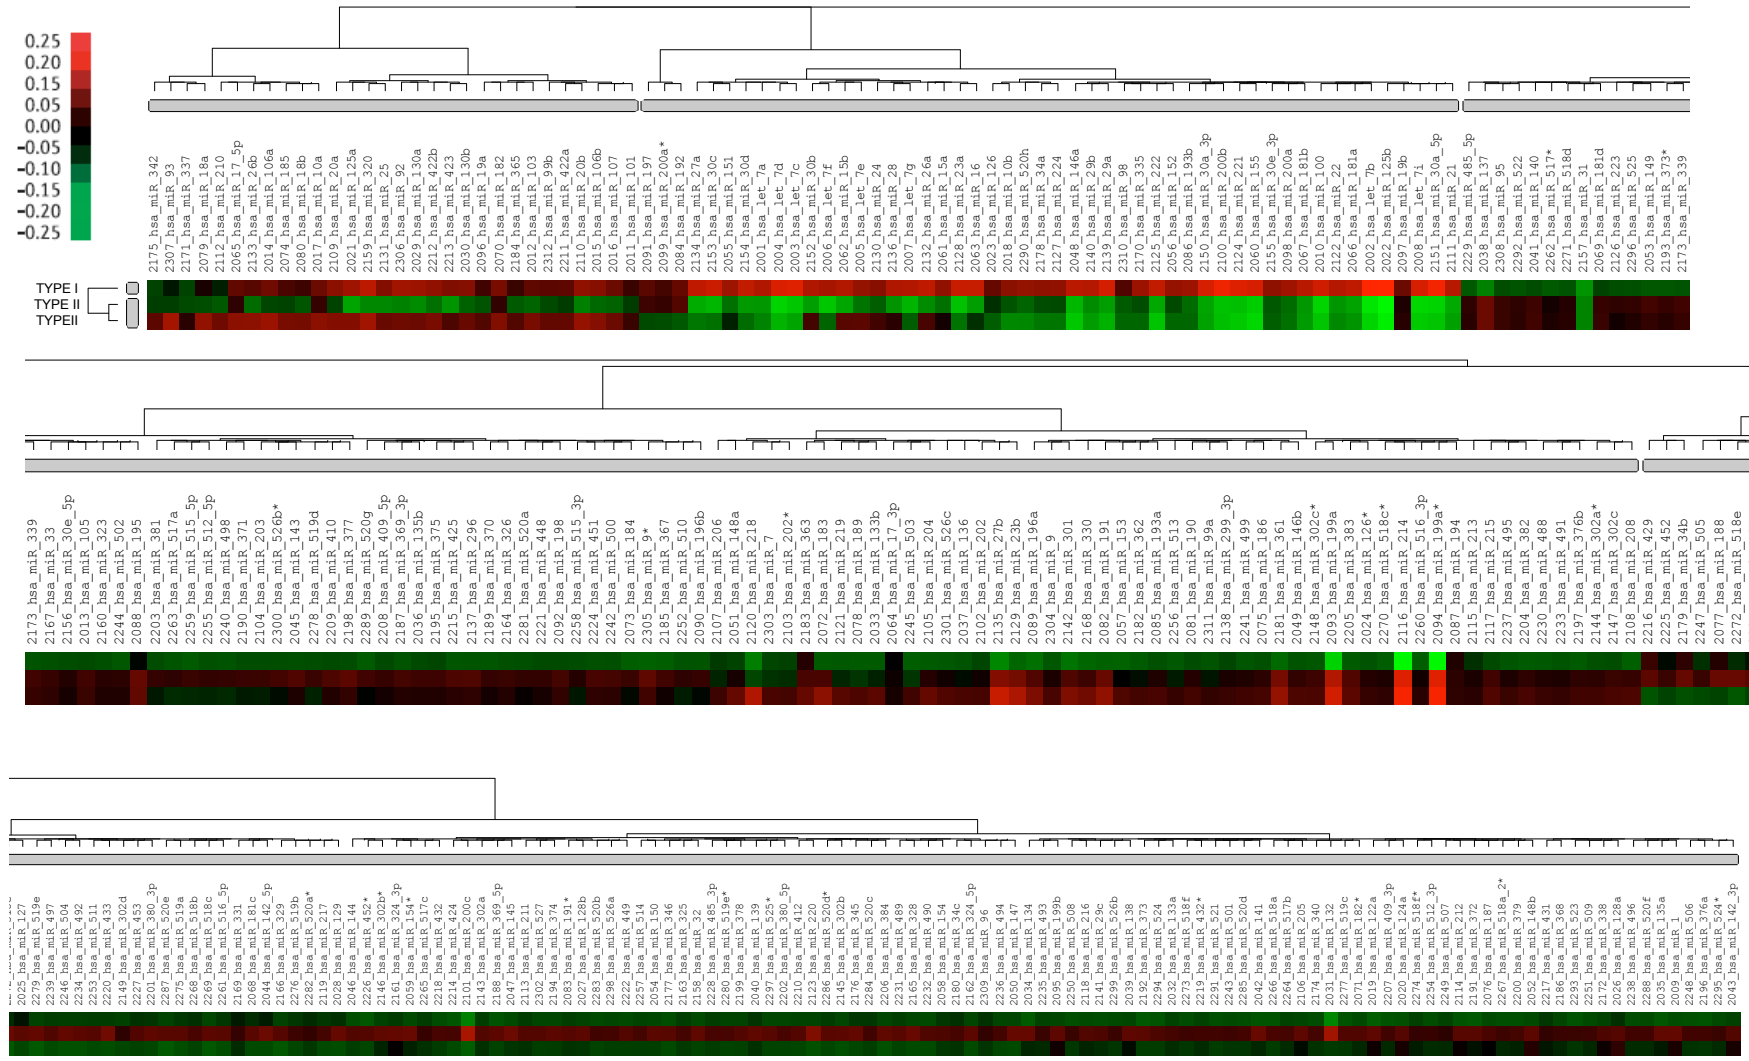

Supplement: NIHMS263797-supplement-supp_fig.pdf [file NIHMS263797-supplement-supp_fig.pdf]
